# Supplementary material for: DNA methylation mediates the effect of exposure to prenatal maternal stress on cytokine production in children at age 13½ years: Project Ice Storm
Source: PubMed Central journal article supplement (PMC4866030; doi:10.1186/s13148-016-0219-0), 2016-05-12
Supplement: 13148_2016_219_MOESM1_ESM.pdf [file 13148_2016_219_MOESM1_ESM.pdf]

**Additional File 1.** Selected 47 CpGs corresponding to 20 genes from NF- $\kappa$ B Signaling---

| CpG sites  | Symbol | Description                                 | Function <sup>a</sup>                                                                                                                                                                                                                  |      |                           |                                                                                                   |
|------------|--------|---------------------------------------------|----------------------------------------------------------------------------------------------------------------------------------------------------------------------------------------------------------------------------------------|------|---------------------------|---------------------------------------------------------------------------------------------------|
| cg01636910 | BCL10  | B-Cell CLL/Lymphoma 10                      | The protein encoded by this gene contains a caspase recruitment domain (CARD), and has been shown to induce apoptosis and to activate NF-kappaB.                                                                                       |      |                           |                                                                                                   |
| cg11975790 | DDR1   | Discoidin Domain Receptor Tyrosine Kinase 1 | The protein encoded by this gene belongs to a subfamily of tyrosine kinase receptors with homology to Dictyostelium discoideum protein discoidin I in their extracellular domain, and that are activated by various types of collagen. |      |                           |                                                                                                   |
| cg24850711 | FLT1   | Fms-Related Tyrosine Kinase 1               | This gene encodes a member of the vascular endothelial growth factor receptor (VEGFR) family. This protein binds to VEGFR-A, VEGFR-B and placental growth factor and plays an important role in angiogenesis and vasculogenesis.       |      |                           |                                                                                                   |
| cg13297560 | IGF1R  | Insulin-Like Growth Factor 1 Receptor       | This receptor binds insulin-like growth factor with a high affinity. It has tyrosine kinase activity. The insulin-like growth factor I receptor plays a critical role in transformation events.                                        |      |                           |                                                                                                   |
| cg25830379 |        |                                             |                                                                                                                                                                                                                                        |      |                           |                                                                                                   |
| cg12910851 | IL1R2  | Interleukin 1 Receptor, Type II             | The protein encoded by this gene is a cytokine receptor that belongs to the interleukin 1 receptor family.                                                                                                                             |      |                           |                                                                                                   |
| cg11683242 | LCK    | Lymphocyte-Specific Protein Tyrosine Kinase | This gene is a member of the Src family of protein tyrosine kinases (PTKs). The encoded protein is a key signaling molecule in the selection and maturation of developing T-cells.                                                     |      |                           |                                                                                                   |
| cg17078393 |        |                                             |                                                                                                                                                                                                                                        |      |                           |                                                                                                   |
| cg05350315 |        |                                             |                                                                                                                                                                                                                                        |      |                           |                                                                                                   |
| cg14781242 |        |                                             |                                                                                                                                                                                                                                        |      |                           |                                                                                                   |
| cg20239639 |        |                                             |                                                                                                                                                                                                                                        |      |                           |                                                                                                   |
| cg00501919 | LTA    | Lymphotoxin Alpha                           | The encoded protein, a member of the tumor necrosis factor family, is a cytokine produced by lymphocytes.                                                                                                                              |      |                           |                                                                                                   |
| cg01157951 |        |                                             |                                                                                                                                                                                                                                        |      |                           |                                                                                                   |
| cg13815684 |        |                                             |                                                                                                                                                                                                                                        |      |                           |                                                                                                   |
| cg14441276 |        |                                             |                                                                                                                                                                                                                                        |      |                           |                                                                                                   |
| cg16280132 |        |                                             |                                                                                                                                                                                                                                        |      |                           |                                                                                                   |
| cg17709873 |        |                                             |                                                                                                                                                                                                                                        |      |                           |                                                                                                   |
| cg26348243 |        |                                             |                                                                                                                                                                                                                                        |      |                           |                                                                                                   |
| cg02402436 |        |                                             |                                                                                                                                                                                                                                        |      |                           |                                                                                                   |
| cg09621572 |        |                                             |                                                                                                                                                                                                                                        |      |                           |                                                                                                   |
| cg09736959 |        |                                             |                                                                                                                                                                                                                                        |      |                           |                                                                                                   |
| cg10476003 |        |                                             |                                                                                                                                                                                                                                        |      |                           |                                                                                                   |
| cg11586857 |        |                                             |                                                                                                                                                                                                                                        |      |                           |                                                                                                   |
| cg14437551 |        |                                             |                                                                                                                                                                                                                                        |      |                           |                                                                                                   |
| cg14597739 |        |                                             |                                                                                                                                                                                                                                        |      |                           |                                                                                                   |
| cg16219283 |        |                                             |                                                                                                                                                                                                                                        |      |                           |                                                                                                   |
| cg17169196 |        |                                             |                                                                                                                                                                                                                                        |      |                           |                                                                                                   |
| cg21999229 |        |                                             |                                                                                                                                                                                                                                        |      |                           |                                                                                                   |
| cg24216966 |        |                                             |                                                                                                                                                                                                                                        |      |                           |                                                                                                   |
| cg23079808 |        |                                             |                                                                                                                                                                                                                                        | LTBR | Lymphotoxin Beta Receptor | This gene encodes a member of the tumor necrosis factor receptor superfamily. The encoded protein |

|            |          |                                                                                     |                                                                                                                                                                                                                                              |
|------------|----------|-------------------------------------------------------------------------------------|----------------------------------------------------------------------------------------------------------------------------------------------------------------------------------------------------------------------------------------------|
|            |          | (TNFR Superfamily, Member 3)                                                        | plays a role in signalling during the development of lymphoid and other organs, lipid metabolism, immune response, and programmed cell death.                                                                                                |
| cg16826777 | MAP3K14  | Mitogen-Activated Protein Kinase Kinase Kinase 14                                   | This gene encodes mitogen-activated protein kinase kinase kinase 14, which is a serine/threonine protein-kinase. This kinase binds to TRAF2 and stimulates NF-kappaB activity.                                                               |
| cg03974193 | MAP4K4   | Mitogen-Activated Protein Kinase Kinase Kinase Kinase 4                             | The protein encoded by this gene is a member of the serine/threonine protein kinase family. This kinase has been shown to specifically activate MAPK8/JNK.                                                                                   |
| cg00689225 | NFKBIA   | Nuclear Factor Of Kappa Light Polypeptide Gene Enhancer In B-Cells Inhibitor, Alpha | This gene encodes a member of the NF-kappa-B inhibitor family, which contain multiple ankrin repeat domains. The encoded protein interacts with REL dimers to inhibit NF-kappa-B/REL complexes which are involved in inflammatory responses. |
| cg16518861 |          |                                                                                     |                                                                                                                                                                                                                                              |
| cg01320698 | PIK3CD   | Phosphatidylinositol-4,5-Bisphosphate 3-Kinase, Catalytic Subunit Delta             | The protein encoded by this gene is a class I PI3K found primarily in leukocytes. Phosphoinositide 3-kinases (PI3Ks) phosphorylate inositol lipids and are involved in the immune response.                                                  |
| cg07499142 |          |                                                                                     |                                                                                                                                                                                                                                              |
| cg04610450 | PIK3R2   | Phosphoinositide-3-Kinase, Regulatory Subunit 2 (Beta)                              | The protein encoded by this gene is a regulatory component of PI3K.                                                                                                                                                                          |
| cg11953794 |          |                                                                                     |                                                                                                                                                                                                                                              |
| cg02481000 | PRKCZ    | Protein Kinase C, Zeta                                                              | Protein kinase C (PKC) zeta is a member of the PKC family of serine/threonine kinases which are involved in a variety of cellular processes such as proliferation, differentiation and secretion.                                            |
| cg04916416 | TGFB2    | Transforming Growth Factor, Beta Receptor II                                        | This gene encodes a member of the Ser/Thr protein kinase family and the TGFB receptor subfamily.                                                                                                                                             |
| cg14578677 | TLR6     | Toll-Like Receptor 6                                                                | The protein encoded by this gene is a member of the Toll-like receptor (TLR) family which plays a fundamental role in pathogen recognition and activation of innate immunity.                                                                |
| cg22014112 | TNFAIP3  | Tumor Necrosis Factor, Alpha-Induced Protein 3                                      | The protein encoded by this gene is a zinc finger protein and ubiquitin-editing enzyme, and has been shown to inhibit NF-kappa B activation as well as TNF-mediated apoptosis.                                                               |
| cg05599723 | TNFRSF1B | Tumor Necrosis Factor Receptor Superfamily, Member 1B                               | The protein encoded by this gene is a member of the TNF-receptor superfamily.                                                                                                                                                                |
| cg15526535 |          |                                                                                     |                                                                                                                                                                                                                                              |
| cg22677556 |          |                                                                                     |                                                                                                                                                                                                                                              |
| cg10721755 | TRAF5    | TNF Receptor-Associated Factor 5                                                    | The scaffold protein encoded by this gene is a member of the tumor necrosis factor receptor-associated factor (TRAF) protein family                                                                                                          |
| cg08859278 | ZAP70    | Zeta-Chain (TCR) Associated Protein Kinase 70kDa                                    | This gene encodes an enzyme belonging to the protein tyrosine kinase family, and it plays a role in T-cell development and lymphocyte activation.                                                                                            |

<sup>a</sup>The public database GeneCards (<http://www.genecards.org>) was used for the annotation of the genes
